1 **Discovery of a 382-nt deletion during the early evolution of SARS-CoV-2**

2

3 **Running title:** A SARS-CoV-2 deletion variant

4

5 Yvonne CF Su<sup>1†</sup>, Danielle E Anderson<sup>1†</sup>, Barnaby E Young<sup>2,3,9‡</sup>, Feng Zhu<sup>1‡</sup>, Martin  
6 Linster<sup>1‡</sup>, Shirin Kalimuddin<sup>1,4</sup>, Jenny GH Low<sup>1,4</sup>, Zhuang Yan<sup>1</sup>, Jayanthi Jayakumar<sup>1</sup>, Louisa  
7 Sun<sup>5</sup>, Gabriel Z Yan<sup>6</sup>, Ian H Mendenhall<sup>1</sup>, Yee-Sin Leo<sup>2,3,7,8,9</sup>, David Chien Lye<sup>2,3,8,9</sup>, Lin-Fa  
8 Wang<sup>1,10\*</sup>, Gavin JD Smith<sup>1,10\*</sup>

9

10 <sup>1</sup>Programme in Emerging Infectious Diseases, Duke-NUS Medical School; <sup>2</sup>National Centre  
11 for Infectious Diseases; <sup>3</sup>Tan Tock Seng Hospital; <sup>4</sup>Singapore General Hospital; <sup>5</sup>Alexandra  
12 Hospital; <sup>6</sup>National University Hospital; <sup>7</sup>Saw Swee Hock School of Public Health, <sup>8</sup>Yong  
13 Loo Lin School of Medicine, <sup>9</sup>Lee Kong Chian School of Medicine, <sup>10</sup>SingHealth Duke-NUS  
14 Global Health Institute, Singapore

15

16 †These authors contributed equally

17 ‡These authors contributed equally

18 \*To whom correspondence may be addressed. LFW [linfa.wang@duke-nus.edu.sg](mailto:linfa.wang@duke-nus.edu.sg) and GJDS

19 [gavin.smith@duke-nus.edu.sg](mailto:gavin.smith@duke-nus.edu.sg).

20 **To date, the SARS-CoV-2 genome has been considered genetically more stable than**  
21 **SARS-CoV or MERS-CoV. Here we report a 382-nt deletion covering almost the entire**  
22 **open reading frame 8 (ORF8) of SARS-CoV-2 obtained from eight hospitalized patients**  
23 **in Singapore. The deletion also removes the ORF8 transcription-regulatory sequence**  
24 **(TRS), which in turn enhances the downstream transcription of the N gene. We also**  
25 **found that viruses with the deletion have been circulating for at least four weeks.**  
26 **During the SARS-CoV outbreak in 2003, a number of genetic variants were observed in**  
27 **the human population [1], and similar variation has since been observed across SARS-**  
28 **related CoVs in humans and bats. Overwhelmingly these viruses had mutations or**  
29 **deletions in ORF8, that have been associated with reduced replicative fitness of the**  
30 **virus [2]. This is also consistent with the observation that towards the end of the**  
31 **outbreak sequences obtained from human SARS cases possessed an ORF8 deletion that**  
32 **may be associated with host adaptation [1]. We therefore hypothesise that the major**  
33 **deletion revealed in this study may lead to an attenuated phenotype of SARS-CoV-2.**

34

35 On 1 December 2019, a novel coronavirus emerged from Hubei province in China and  
36 infected people visiting the Huanan seafood market in Wuhan [3]. The virus demonstrated  
37 efficient human-to-human transmission within mainland China and subsequently spread  
38 across many countries. The virus was soon identified as 2019-nCoV, more recently  
39 designated SARS-CoV-2, while the disease is referred to as COVID-19. On 30 January 2020,  
40 the World Health Organization declared a Public Health Emergency of International  
41 Concern. As of 10 March 2020, the COVID-19 outbreak has led to 113,702 confirmed cases  
42 and 4,012 deaths globally [4]. Zoonotic viruses have crossed the species barrier from animals  
43 to humans and the success of an interspecies transmission is the ability of a novel virus to

44 adapt, via genetic mutation events, to a new host and cause sustained transmission that can  
45 lead to a significant outbreak.

46

47 Nasopharyngeal swabs collected from hospitalized patients positive for SARS-CoV-2 in  
48 Singapore were subjected to next generation sequencing (NGS) analysis, with and without  
49 passaging in Vero-E6 cells. The NGS data revealed a 382-nt deletion towards the 3' end of  
50 the viral genomes obtained from multiple patients (Suppl. Table 1). To confirm this  
51 observation, specific PCR primers were designed flanking the deleted region and Sanger  
52 sequencing performed (Suppl. Fig. 1). This verified the deletion at positions 27,848 to 28,229  
53 of the SARS-CoV-2 genome. Interrogation of the NGS assemblies of these 382-nt deletion  
54 variants (referred to hereafter as  $\Delta 382$ ) indicated that the virus populations were  
55 homogenous.

56

57 Apart from the 382-nt deletion, the genome organization of the  $\Delta 382$  viruses is identical to  
58 that of other SARS-CoV-2 (Fig. 1A). Closer examination of the deletion indicated that it  
59 spans an area of the ORF7b and ORF8 that includes the ORF8 transcriptional regulator  
60 sequence (TRS), eliminating ORF8 transcription (Fig. 1B). The ORF8 region has been  
61 identified as an evolutionary hotspot of SARS-CoVs. For instance, sequences of human  
62 SARS-CoV TOR2 and LC2 exhibit 29-nt and 415-nt deletions, whereas those of bat SARS-  
63 CoV JTMC15 have discontinuous deletions in ORF7/8 (Fig. 1B) [5-8]. The ORF8 region of  
64 SARS-CoVs has been shown to play a significant role in adaptation to the human host  
65 following interspecies transmission [7] and virus replicative efficiency [2]. Similarly the  
66 disruption of ORF8 region in  $\Delta 382$  viruses may be a result of human adaptation after the  
67 emergence of SARS-CoV-2.

68

69 To investigate the possible effects of the TRS deletion, we calculated and compared the total  
70 number of transcripts per million (TPM) of each gene between wild-type (WT) and  $\Delta 382$   
71 viruses. For each gene, we counted unambiguous reads that uniquely mapped to the gene-  
72 specific transcripts that include the joint leader and TRS sequences [9]. We analysed three  
73 WT and two  $\Delta 382$  sequences for which two independent NGS library preparations were  
74 available. Our results indicate differential patterns of TPM level between WT and  $\Delta 382$   
75 viruses (Fig. 2A). The  $\Delta 382$  sequences displayed a greater level of TPMs in the ORF6,  
76 ORF7a and N genes compared to WT. More specifically, the  $\Delta 382$  N gene, downstream of  
77 ORF8, showed a significant increase in the TPM level. To further determine the impact of the  
78 382-nt deletion on the transcription of the N gene, we conducted qPCR to measure the  
79 relative abundance of the RNAs from 2 genes (E and N) located upstream and downstream of  
80 the deleted region, respectively. Results shown in Figure 2B confirm the enhancement of N  
81 gene transcription in  $\Delta 382$  viruses. This enhancement was consistently observed regardless of  
82 the sample type, whether directly from swab samples or passaged viruses.

83

84 The global phylogeny of SARS-CoV-2 (Suppl. Fig. 2) revealed a comb-like appearance in  
85 the phylogenetic tree and a general lack of phylogenetic resolution, reflecting the high  
86 similarity of the virus genomes. This tree topology is a typical characteristic of a novel  
87 interspecies transmission, wherein the viruses are infecting immunologically naïve  
88 populations with sustained human-to-human transmission, as previously shown for the early  
89 stages of the 2009 H1N1 pandemic [10]. Notably, we observe an emerging virus lineage  
90 (tentatively designated as “Lineage 1” in Suppl. Fig. 2) that consists of sequences from  
91 various newly affected countries with recent virus introductions. All viruses from this recent  
92 lineage possess an amino acid substitution at residue 250 (from lysine to serine) on the ORF8

93 gene [11], which is known to undergo strong positive selection during animal-to-human  
94 transmission [7].

95

96 To estimate the divergence times among lineages of SARS-CoV-2, we reconstructed a dated  
97 phylogeny based on 137 complete genomes, including data from this study. The estimated  
98 rate of nucleotide substitutions among SARS-CoV-2 viruses is approximately at  $8.68 \times 10^{-4}$   
99 substitutions per site per year (95% HPD:  $5.44 \times 10^{-4}$ – $1.22 \times 10^{-3}$ ), which is moderately lower  
100 than SARS-CoV ([12]:  $0.80$ – $2.38 \times 10^{-3}$ ) and MERS-CoV (with a mean rate [13] of:  $1.12 \times 10^{-3}$   
101 and 95% HPD:  $58.76 \times 10^{-4}$ – $1.37 \times 10^{-3}$ ) as well as human seasonal influenza viruses (ranging  
102  $1.0$ – $5.5 \times 10^{-3}$  depending on individual gene segments [10, 14–16]. In contrast, the estimated  
103 rate of SARS-CoV-2 viruses is greater than estimates for human coronaviruses by a  
104 magnitude order of  $4 \times 10^{-4}$  [17].

105

106 The mean TMRCA estimates indicate the introduction of SARS-CoV-2 into humans (Fig. 3.  
107 node A) occurred in the middle of November 2019 (95% HPD: 2019.77–2019.94) (Table 1),  
108 suggesting that the viruses were present in human hosts approximately one month before the  
109 outbreak was detected. A single amino-acid mutation was fixed on the ORF8 region of all  
110 full-genome Lineage 1 viruses (Fig. 3, node B), with the TMRCA estimate of 22 December  
111 2019 (95% HPD: 2019.9–2020.0). The  $\Delta 382$  viruses form a monophyletic group within  
112 Lineage 1, and dating estimates indicate that they may have arisen in the human population in  
113 Singapore around 07 February 2020 (95% HPD: 2020.12–2020.06), consistent with the date  
114 of collection of the  $\Delta 382$  positive samples (17–19 February 2020). The three  $\Delta 382$  viruses  
115 shared a high level of nucleotide similarities (99.9%) with only 5 nucleotide differences  
116 between them. Although the dated phylogeny indicates that  $\Delta 382$  viruses clustered together  
117 and are possibly derived from a single source, there is a general lack of statistical support in

118 SARS-CoV-2 phylogenies due to its recent emergence, and evolutionary inferences should be  
119 made with caution.

120

121 In this report we describe the first major evolutionary event of the SARS-CoV-2 virus  
122 following its emergence into the human population. Although the biological consequences of  
123 this deletion remain unknown, the alteration of the N gene transcription would suggest this  
124 may have an impact on virus phenotype. Recent work has indicated that ORF8 of SARS-CoV  
125 plays a functional role in virus replicative fitness and may be associated with attenuation  
126 during the early stages of human-to-human transmission [2]. Given the prevalence of a  
127 variety of deletions in the ORF8 of SARS-CoVs, it is likely that we will see further deletion  
128 variants emerge with the sustained transmission of SARS-CoV-2 in humans. Future research  
129 should focus on the phenotypic consequences of  $\Delta 382$  viruses in the transmission dynamics  
130 of the current epidemics and the immediate application of this genomic marker for molecular  
131 epidemiological investigation.

132 **Online content.** Any methods, additional references, Nature Research reporting summaries,  
133 source data, extended data, supplementary information, acknowledgements, peer review  
134 information; details of author contributions and competing interests; and statements of data  
135 availability are available at [Article DOI].

136

137 **Data availability.** The new sequences generated in this study have been deposited in  
138 GISAID database under accession numbers EPI\_ISL\_407987, EPI\_ISL\_407988,  
139 EPI\_ISL\_410535 to EPI\_ISL\_410537 for WT viruses and EPI\_ISL\_414378 to  
140 EPI\_ISL\_414380 for  $\Delta$ 382 viruses.

141

142 **Acknowledgements.** This study was supported by the Duke-NUS Signature Research  
143 Programme funded by the Ministry of Health, Singapore, the National Medical Research  
144 Council under its COVID-19 Research Fund (NMRC Project No. COVID19RF-001) and by  
145 National Research Foundation Singapore grant NRF2016NRFNSFC002-013 (Combating the  
146 Next SARS-or MERS-Like Emerging Infectious Disease Outbreak by Improving Active  
147 Surveillance). We thank Viji Vijayan, Benson Ng and Velraj Sivalingam of the Duke-NUS  
148 Medical School ABSL3 facility for logistics management and assistance. We thank all  
149 scientific staff who assisted with processing clinical samples, especially Velraj Sivalingam,  
150 Adrian Kang, Randy Foo, Wan Ni Chia and Akshamal Gamage. We thank Su Ting Tay,  
151 Ming Hui Lee and Angie Tan from the Duke-NUS Medical School Genome Biology Facility  
152 for expert and rapid technical assistance.

153

154 **Author contributions.** YCFS, DEA, LFW, GJDS designed and supervised research. BEY,  
155 SK, JGHL, LS, GZY, YSL, DCL collected and provided samples. DEA, ML, YZ conducted

156 experiments. YCFS, ZF, JJ, IHM, GJDS performed analyses. YCFS, ZF, ML, LFW, GJDS  
157 wrote the paper. All authors reviewed and approved the manuscript.

158

## 159 **Methods**

160 **Ethics statement.** This study was undertaken as part of the national disease outbreak and the  
161 response and the protocols were approved by the ethics committee of the National Healthcare  
162 Group. Patient samples were collected under PROTECT (2012/00917), a multi-centred  
163 Prospective Study to Detect Novel Pathogens and Characterize Emerging Infections. Work  
164 undertaken at the Duke-NUS Medical School ABSL3 laboratory was approved by the Duke-  
165 NUS ABSL3 Biosafety Committee, National University of Singapore and Ministry of Health  
166 Singapore.

167

168 **Virus culture, RNA extraction and sequencing.** Clinical samples from infected patients  
169 were collected from public hospitals in Singapore from January–February 2020. Material  
170 from clinical samples was used to inoculate Vero-E6 cells (ATCC®CRL-1586™). Total RNA  
171 was extracted using E.Z.N.A. Total RNA Kit I (Omega Bio-tek) according to manufacturer's  
172 instructions and samples analysed by real-time quantitative reverse transcription-PCR (RT-  
173 qPCR) for the detection of SARS-CoV-2 as previously described [18]. Whole genome  
174 sequencing was performed using next-generation sequencing (NGS) methodology. The  
175 cDNA libraries were constructed using TruSeq RNA Library Prep Kit (Illumina) according to  
176 the manufacturer's instructions and sequenced on an Illumina MiSeq System. Raw NGS  
177 reads were trimmed by Trimmomatic v0.39 [19] to remove adaptors and low-quality bases.  
178 Genome sequences were assembled and consensus sequences obtained using the BWA  
179 algorithm in UGENE v.33. To verify the presence of the deletion in the SARS-CoV-2  
180 genome, we designed two specific PCR primers (F primer: 5'-



181 TGTTAGAGGTACAACAGTACTTT-3' and R primer: 5'-  
182 GGTTAGTAGAAATACCATCTTGGA-3') targeting the ORF7–8 regions. For samples with  
183 low Ct values, a hemi-nested PCR was then performed with primers (5'-  
184 TGTTTATAACAACCTTTGCTTCACA-3') and (5'-GGTAGTAGAAATACCATCTTGGA-  
185 3'). The PCR mixture contained the cDNA, primers (10 $\mu$ M each), 10x Pfu reaction buffer  
186 (Promega), Pfu DNA polymerase (Promega) and dNTP mix (10mM, Thermo Scientific). The  
187 PCR reaction was carried out with the following conditions: 95°C for 2 min, 35 cycles at  
188 95°C for 1 min, 52°C for 30 sec, 72°C for 1 min and a final extension at 72°C for 10 min in a  
189 thermal cycler (Applied Biosystems Veriti). Deletions in the PCR products were visualized  
190 by gel electrophoresis and confirmed by Sanger sequencing. Three full  $\Delta$ 382 genomes were  
191 generated and designated BetaCoV/Singapore/12/2020, BetaCoV/Singapore/13/2020 and  
192 BetaCoV/Singapore/14/2020 along with five WT SARS-CoV-2 genomes previously  
193 generated in our laboratories and deposited in GISAID (see Suppl. Table 1).

194

195 **Genomic characterization.** To characterize and map the deletion regions of SARS-CoV-2  
196 viruses, we compared with available SARS-CoV-2 and SARs-CoV related genomes from bat  
197 SARs-CoV-JTMC15 (accession number: KY182964) and humans SARs-CoV-Tor 2  
198 (accession number: AY274119) and LC2 (accession number: AY394999). The viral genome  
199 organizations of Wuhan-Hu-1 (accession number: MN908947) and Singapore SARS-CoV-2  
200 (Singapore/2 /2020: EPI\_ISL\_407987) comprise the following gene order and lengths:  
201 ORF1ab (open-reading frame) replicase (21291 nt), spike (S: 3822 nt), ORF3 (828 nt),  
202 envelope (E: 228 nt), membrane (M: 669 nt), ORF6 (186 nt), ORF7ab (498 nt), ORF8 (366  
203 nt) and nucleocapsid (N: 1260 nt).

204

205 To understand possible effects of the TRS deletion on the ORF8 region, we analysed the total  
206 number of transcripts per million (TPM) of each gene between wildtype and  $\Delta 382$  variants.  
207 For each gene, unambiguous reads which uniquely mapped to the specific joint leader and  
208 TRS sequences are counted. We analysed three patients of SARS-CoV-2 wild type and two  
209 patients of SARS-CoV-2 variants and independent NGS library preparations were performed  
210 twice for each sample. The Wuhan-Hu-1 was used as the reference sequence for genomic  
211 coordinates. Leader RNA sequence is situated at the 5' UTR region of the genome and the  
212 core sequence consists of 26 nt: UCUCUAAACGAACUUUAAAUCUGUG. Each of the  
213 coding genes is preceded by a core transcription regulatory sequence (TRS) which is highly  
214 conserved (i.e. ACGAAC), resembling the leader core sequence. The leader RNA is joined to  
215 the TRS regions of different genes and the joining is required for driving subgenomic  
216 transcription. Coding sequence (CDS), leader and TRS sequences annotations were generated  
217 in Geneious and followed published SARS-CoV studies [9]. To characterize the differential  
218 levels of TRS for each gene, 70 nt leader sequence and 230 nt downstream of each TRS  
219 sequence were annotated individually to form a 300bp leader-TRS transcript for the splicing-  
220 aware aligners in R package rtracklayer (v 1.44). NGS raw fastq reads were then mapped to  
221 the reference genome by Geneious RNA-Seq mapper with the annotation of splice-junctions  
222 for the leader-TRS. For each gene, the TPM of leader-TRS was then calculated in Geneious  
223 by excluding ambiguous reads which may come from other TRS. The resulting TPM data  
224 was generated in Geneious and graphs plotted using ggplot 2 (v3.2.0) in R v3.6.1. Wilcoxon  
225 one-sided tests were performed in R to test the significant differences between WT and  $\Delta 382$   
226 samples. We also compared individual Ct values of E and N genes between WT and  $\Delta 382$   
227 viruses using qRT-PCR assays as previously described [18]. Samples used in this analysis  
228 included nasopharyngeal swabs from three WT patient samples and both nasopharyngeal

229 swabs and passaged samples from two  $\Delta$ 382 patients (n=7). Significance between groups was  
230 assessed using a one-way analysis of variance (ANOVA) in PRISM v8.3.1.

231

232 **Phylogenetic analyses.** All available genomes of SARS-CoV-2 with associated virus  
233 sampling dates were downloaded from the GISAID database. Genome sequence alignment  
234 was performed and preliminary maximum likelihood phylogenies of complete genome were  
235 reconstructed using RAxML with 1,000 bootstrap replicates in Geneious R9.0.3 software  
236 (Biomatters Ltd). Any sequence outliers were removed from subsequent analyses. To  
237 reconstruct a time-scaled phylogeny, an uncorrelated lognormal relaxed-clock model with an  
238 exponential growth coalescent prior and the HKY85+ $\Gamma$  substitution model was used in the  
239 program BEAST v1.10.4 [20] to simultaneously estimate phylogeny, divergence times and  
240 rates of nucleotide substitution. Four independent Markov Chain Monte Carlo (MCMC) runs  
241 of 100 million generations were performed and sampled every 10,000 generations. The runs  
242 were checked for convergence in Tracer v1.7 [21] and that effective sampling size (ESS)  
243 values of all parameters was >200. The resulting log and tree files were combined after  
244 removing appropriate burn-in values using LogCombiner [20], and the maximum clade  
245 credibility (MCC) tree was subsequently generated using TreeAnnotator [20].

246 **References:**

- 247 1. Chinese, S.M.E.C., *Molecular evolution of the SARS coronavirus during the course of*  
248 *the SARS epidemic in China*. Science, 2004. **303**(5664): p. 1666-9.
- 249 2. Muth, D., et al., *Attenuation of replication by a 29 nucleotide deletion in SARS-*  
250 *coronavirus acquired during the early stages of human-to-human transmission*. Sci  
251 Rep, 2018. **8**(1): p. 15177.
- 252 3. Lu, R., et al., *Genomic characterisation and epidemiology of 2019 novel coronavirus:*  
253 *implications for virus origins and receptor binding*. The Lancet, 2020. **395**(10224): p.  
254 565-574.
- 255 4. World\_Health\_Organization. *Coronavirus disease (COVID-2019) situation reports*.  
256 2020 [cited 2020 Mar 2]; Available from:  
257 <https://www.who.int/emergencies/diseases/novel-coronavirus-2019/situation-reports>.
- 258 5. Chinese, S.M.E.C., *Molecular evolution of the SARS coronavirus during the course of*  
259 *the SARS epidemic in China*. Science (New York, N.Y.), 2004. **303**(5664): p. 1666-  
260 1669.
- 261 6. Wang, L.-F., et al., *Review of bats and SARS*. Emerging infectious diseases, 2006.  
262 **12**(12): p. 1834-1840.
- 263 7. Lau, S.K., et al., *Severe Acute Respiratory Syndrome (SARS) Coronavirus ORF8*  
264 *Protein Is Acquired from SARS-Related Coronavirus from Greater Horseshoe Bats*  
265 *through Recombination*. J Virol, 2015. **89**(20): p. 10532-47.
- 266 8. Xu, L., et al., *Detection and characterization of diverse alpha- and betacoronaviruses*  
267 *from bats in China*. Virol Sin, 2016. **31**(1): p. 69-77.
- 268 9. Hussain, S., et al., *Identification of novel subgenomic RNAs and noncanonical*  
269 *transcription initiation signals of severe acute respiratory syndrome coronavirus*. J  
270 Virol, 2005. **79**(9): p. 5288-95.

- 271 10. Su, Y.C.F., et al., *Phylogenetics of H1N1/2009 influenza reveals the transition from*  
272 *host adaptation to immune-driven selection*. Nature Communications, 2015. **6**: p.  
273 7952.
- 274 11. Tang, X., et al., *On the origin and continuing evolution of SARS-CoV-2*. National  
275 Science Review, 2020.
- 276 12. Zhao, Z., et al., *Moderate mutation rate in the SARS coronavirus genome and its*  
277 *implications*. BMC Evolutionary Biology, 2004. **4**(1): p. 21.
- 278 13. Cotten, M., et al., *Spread, circulation, and evolution of the Middle East respiratory*  
279 *syndrome coronavirus*. mBio, 2014. **5**(1): p. e01062-13.
- 280 14. Vijaykrishna, D., et al., *The contrasting phylogenetics of human influenza B viruses*.  
281 eLife, 2015. **4**: p. e05055.
- 282 15. Virk, R.K., et al., *Divergent evolutionary trajectories of influenza B viruses underlie*  
283 *their contemporaneous epidemic activity*. Proceedings of the National Academy of  
284 Sciences, 2020. **117**(1): p. 619-628.
- 285 16. Rambaut, A., et al., *The genomic and epidemiological dynamics of human influenza A*  
286 *virus*. Nature, 2008. **453**(7195): p. 615-619.
- 287 17. Vijgen, L., et al., *Complete Genomic Sequence of Human Coronavirus OC43:*  
288 *Molecular Clock Analysis Suggests a Relatively Recent Zoonotic Coronavirus*  
289 *Transmission Event*. Journal of Virology, 2005. **79**(3): p. 1595-1604.
- 290 18. Corman, V.M., et al., *Detection of 2019 novel coronavirus (2019-nCoV) by real-time*  
291 *RT-PCR*. Eurosurveillance, 2020. **25**(3): p. 2000045.
- 292 19. Bolger, A.M., M. Lohse, and B. Usadel, *Trimmomatic: a flexible trimmer for Illumina*  
293 *sequence data*. Bioinformatics, 2014. **30**(15): p. 2114-2120.
- 294 20. Suchard, M.A., et al., *Bayesian phylogenetic and phylodynamic data integration*  
295 *using BEAST 1.10*. Virus Evol, 2018. **4**(1): p. vey016.

- 296 21. Rambaut, A., et al., *Posterior Summarization in Bayesian Phylogenetics Using Tracer*  
297 *1.7*. Syst Biol, 2018. **67**(5): p. 901-904.  
298

299 **Table 1.** TMRCA estimates of major SARS-CoV-2 nodes.

| Node | Mean TMRCA                 | Lower 95% HPD              | Upper 95% HPD              |
|------|----------------------------|----------------------------|----------------------------|
| A    | 2019.87 (15 November 2019) | 2019.77 (09 October 2019)  | 2019.94 (11 December 2019) |
| B    | 2019.97 (22 Dec 2019)      | 2019.90 (26 November 2019) | 2020.00 (01 January 2020)  |
| C    | 2020.09 (07 Feb 2020)      | 2020.06 (24 January 2020)  | 2020.12 (14 Feb 2020)      |

300 Abbreviations: TMRCA, time to most recent common ancestor, HPD: highest posterior  
301 density.

Figure 1.

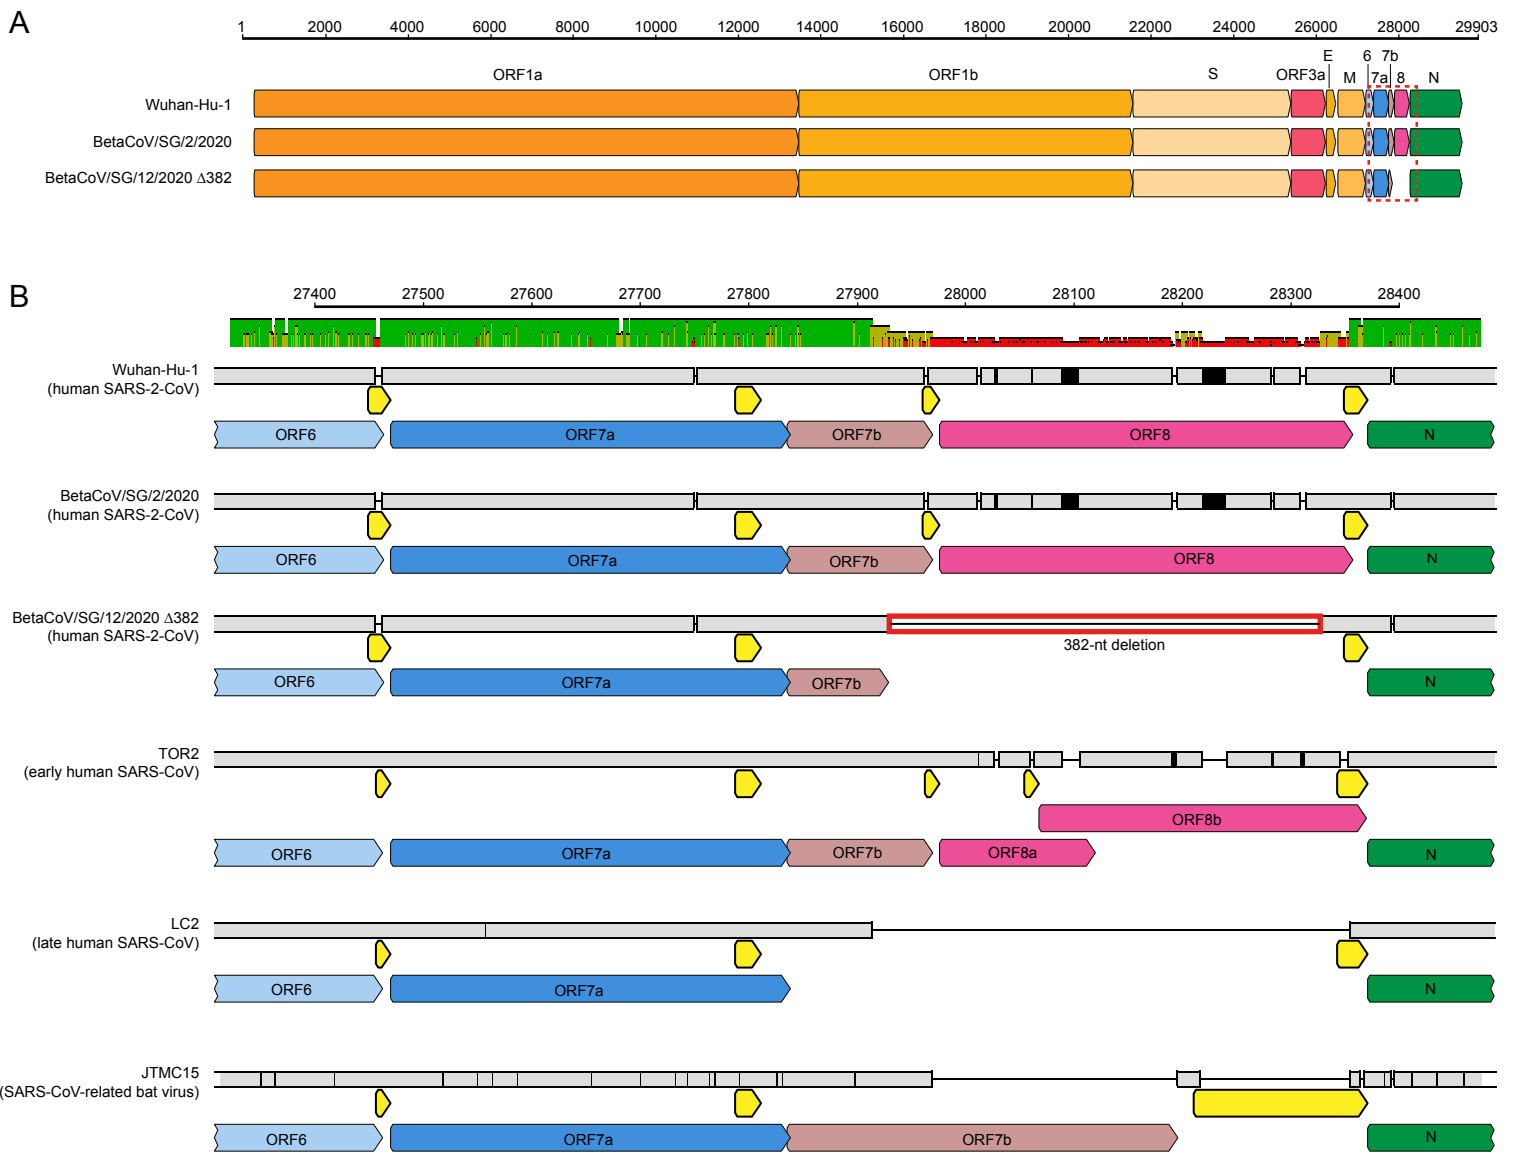

**Figure 1. Schematic comparison of SARS-2-CoV, SARS-CoV and SARSr-CoV genomes.**

**A.** Full genome sequences of SARS-2-CoV isolates Wuhan-Hu-1 (GenBank: MN908947), BetaCoV/Singapore/2/2020 (GISAID: 407987), and BetaCoV/Singapore/12/2020  $\Delta$ 382 (GISAID: EPI\_ISL\_414378). **B.** Magnification of genomic region (dashed box in Figure 1A), numbers on horizontal axes indicate the nucleotide position relative to Wuhan-Hu-1, grey boxes indicate sequence coverage at a certain position, black horizontal lines represent a deletion at a certain position, open reading frames (ORFs) are indicated by colored arrows. A red-lined box indicates the 382-nt deletion. Transcription-regulatory sequences (TRSs) are indicated by yellow arrows.



Figure 2A

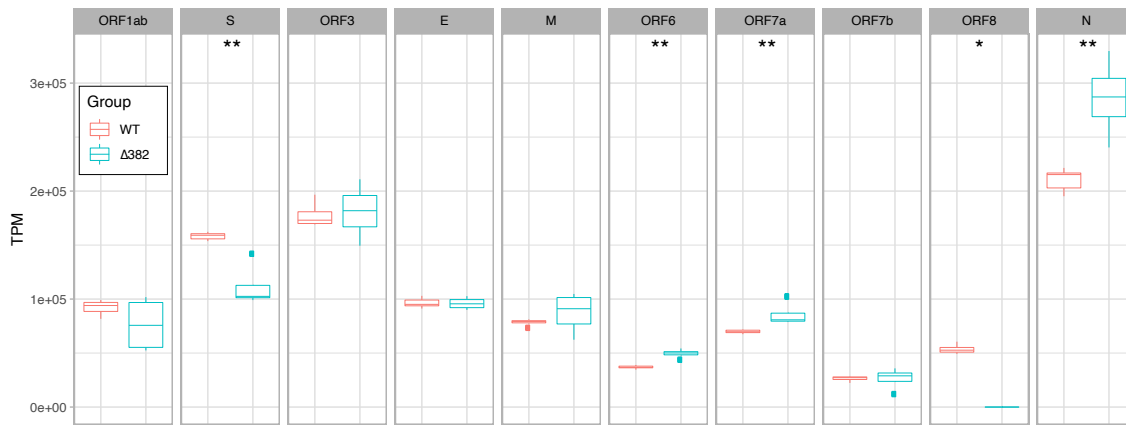

Figure 2B

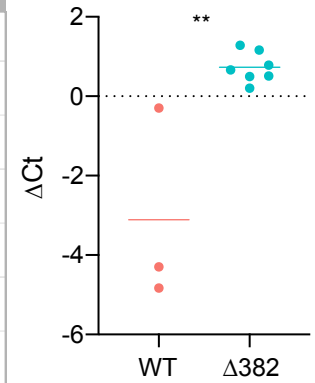

**Figure 2. Comparison of transcription of the transcription of the N gene in wild-type (WT) versus  $\Delta 382$  viruses. A.** Abundance of mapped reads relative to transcriptional regulatory sequence (TRS) positions across the genome. 70 bp of leader sequence and 230 of each TRS-downstream sequence were merged in a splice-junction in the annotation. Transcripts per million reads (TPM) was calculated from reads mapped specifically to each leader-TRS region and a whisker and scatter plot was drawn for each gene. A Wilcoxon test was applied to the TPM for each gene of  $\Delta 382$  to WT (\*:  $p \leq 0.05$  \*\*:  $p \leq 0.01$ ). **B.** Relative abundance of the RNAs of the E gene in comparison to the N gene of WT versus  $\Delta 382$  SARS-CoV-2 ( $p = 0.002$ ) using qPCR. Horizontal bars indicate the mean of each group.

Figure 3.

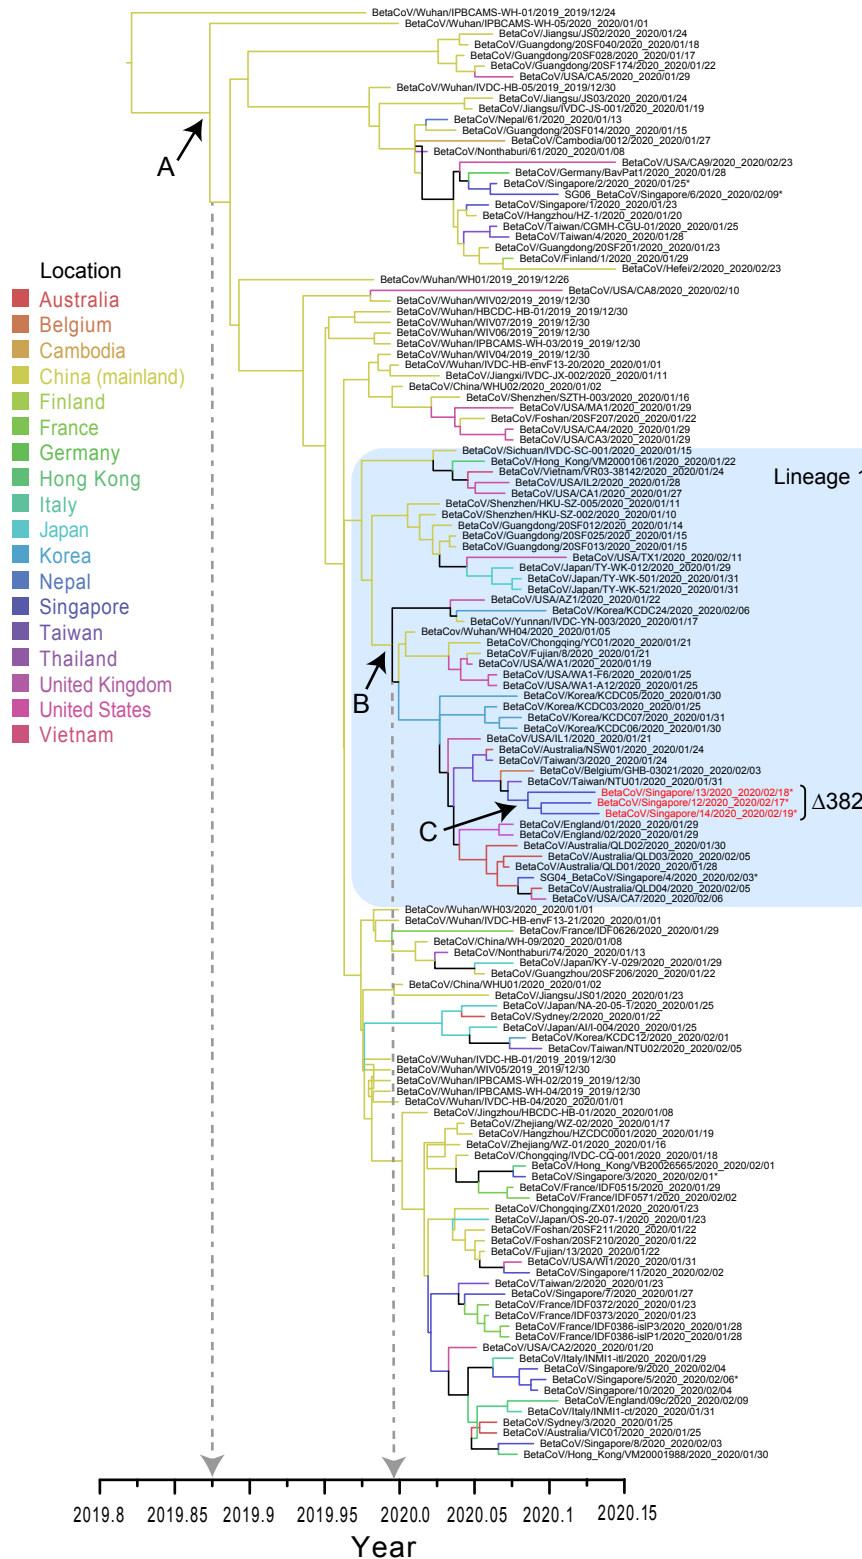

**Figure 3.** Temporal phylogeny of the complete genomes of SARS-CoV-2 viruses reconstructed using an uncorrelated lognormal relaxed clock model in BEAST. Isolate names in red indicate  $\Delta 382$  viruses with a large deletion in the ORF7/8 region as described in this study. \*Indicates virus genomes generated in this study. Colored branches denote different geographical locations.

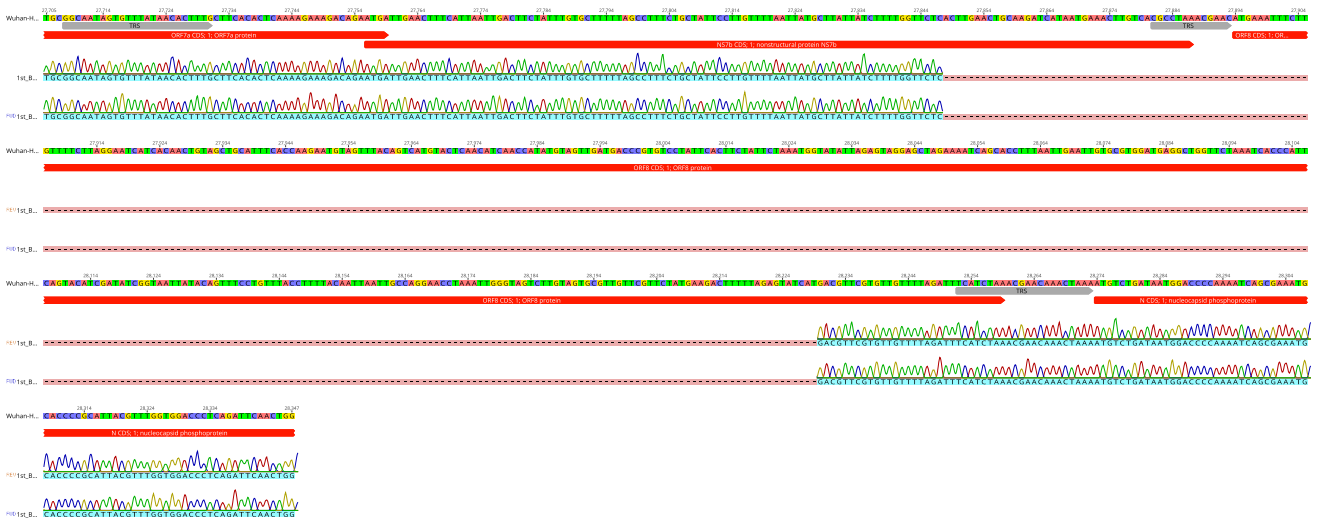

**Supplementary Figure 1.** Sanger sequences of BetaCoV/Singapore/12/2020  $\Delta$ 382 mapped to Wuhan-Hu-1 showing the position of the 382-nt deletion in the SARS-CoV-2 genome.

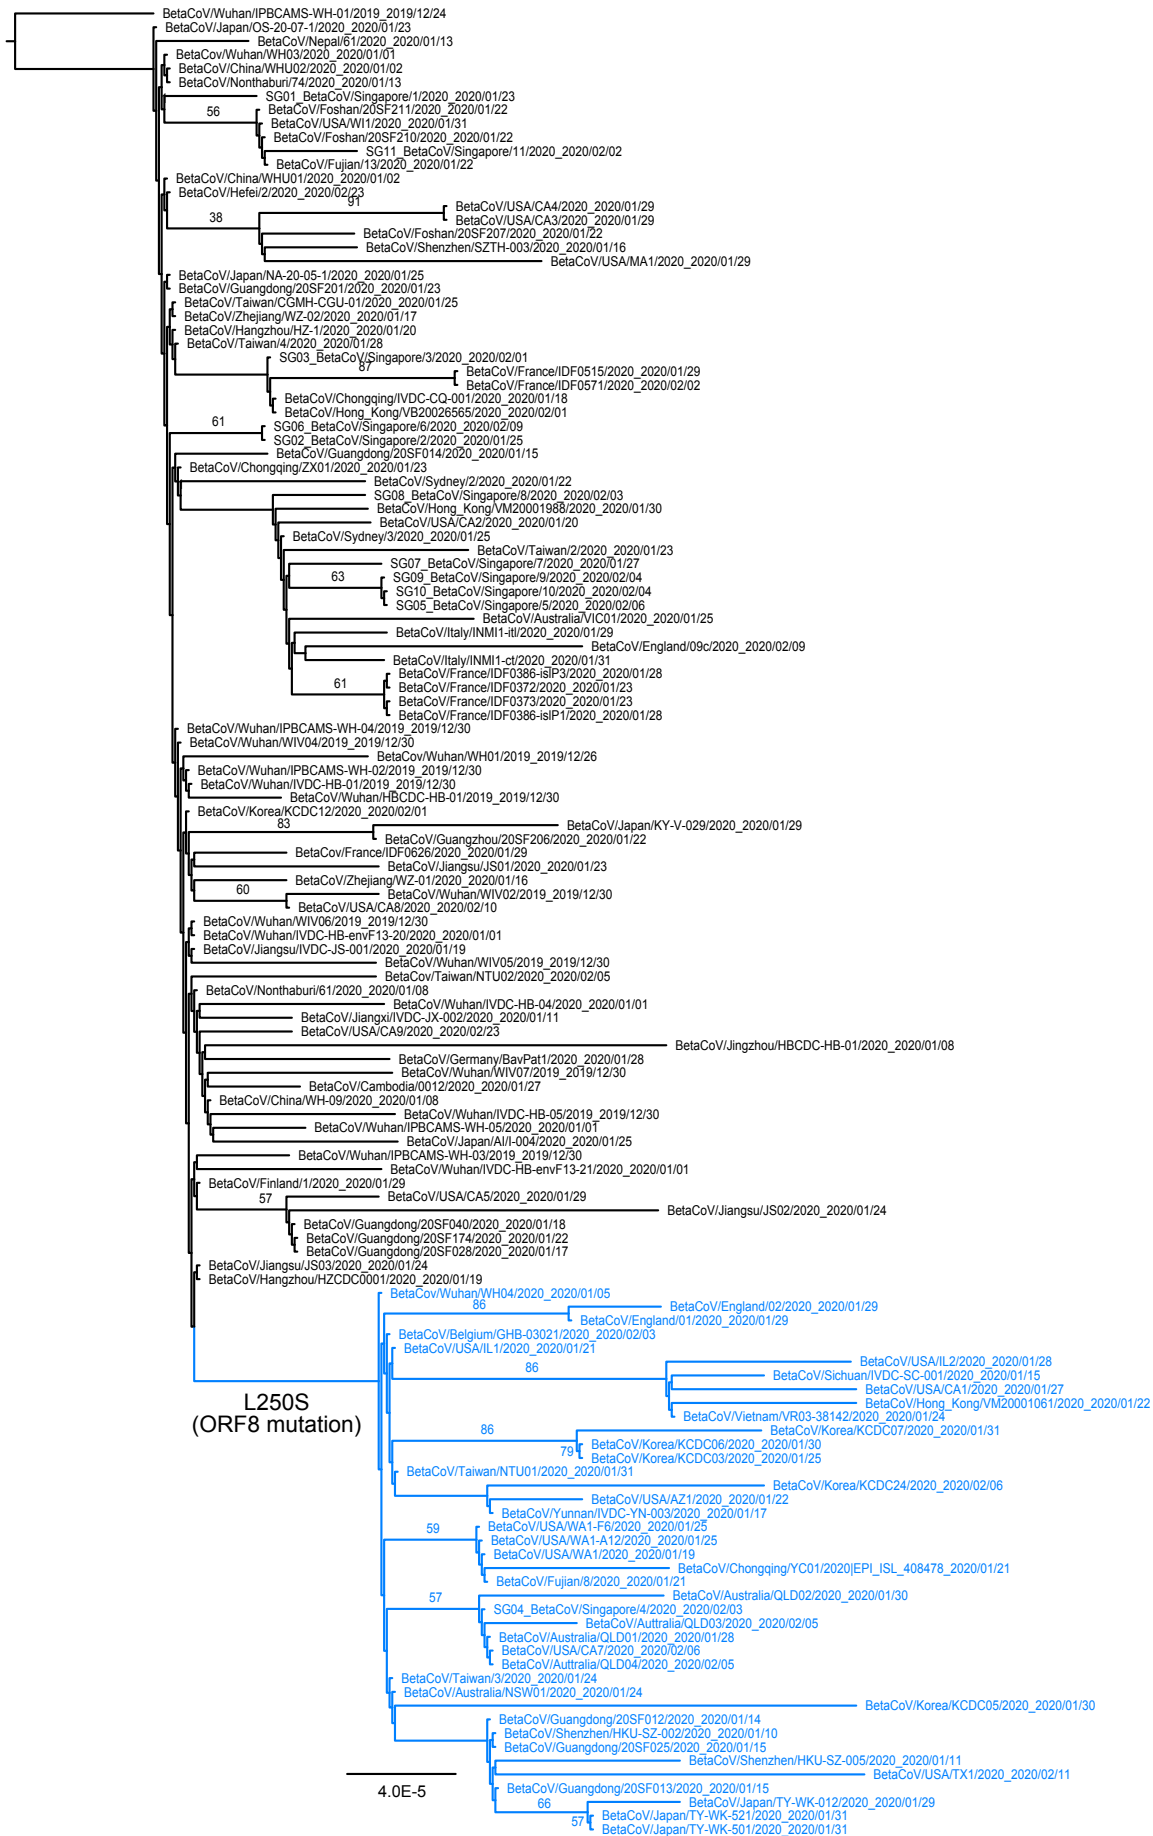

**Supplementary Figure 2.** Maximum-likelihood tree of SARS-CoV-2 genomes reconstructed using RAxML with 1,000 bootstrap replicates.  $\Delta$ 382 viruses were excluded from this analysis as the L250S mutation is located in the ORF8 deletion.

**Supplementary Table 1.**

| <b>Accession number</b> | <b>Virus isolate</b>             | <b>Collection date</b> | <b>Note</b>                  |
|-------------------------|----------------------------------|------------------------|------------------------------|
| EPI_ISL_414378          | BetaCoV/Singapore/12/2020        | 17/02/2020             | 382-nt deletion (this study) |
| EPI_ISL_414379          | BetaCoV/Singapore/13/2020        | 18/02/2020             | 382-nt deletion (this study) |
| EPI_ISL_414380          | BetaCoV/Singapore/14/2020        | 19/02/2020             | 382-nt deletion (this study) |
| EPI_ISL_407987          | BetaCoV/Singapore/2/2020         | 25/01/2020             | Wild type (this study)       |
| EPI_ISL_407988          | BetaCoV/Singapore/3/2020         | 01/02/2020             | Wild type (this study)       |
| EPI_ISL_410535          | BetaCoV/Singapore/4/2020         | 03/02/2020             | Wild type (this study)       |
| EPI_ISL_410536          | BetaCoV/Singapore/5/2020         | 06/02/2020             | Wild type (this study)       |
| EPI_ISL_410537          | BetaCoV/Singapore/6/2020         | 09/02/2020             | Wild type (this study)       |
| EPI_ISL_402119          | BetaCoV/Wuhan/IVDC-HB-01/2019    | 30/12/2019             | Wild type                    |
| EPI_ISL_402120          | BetaCoV/Wuhan/IVDC-HB-04/2020    | 01/01/2020             | Wild type                    |
| EPI_ISL_402121          | BetaCoV/Wuhan/IVDC-HB-05/2019    | 30/12/2019             | Wild type                    |
| EPI_ISL_402123          | BetaCoV/Wuhan/IPBCAMS-WH-01/2019 | 24/12/2019             | Wild type                    |
| EPI_ISL_402124          | BetaCoV/Wuhan/WIV04/2019         | 30/12/2019             | Wild type                    |
| EPI_ISL_402127          | BetaCoV/Wuhan/WIV02/2019         | 30/12/2019             | Wild type                    |
| EPI_ISL_402128          | BetaCoV/Wuhan/WIV05/2019         | 30/12/2019             | Wild type                    |
| EPI_ISL_402129          | BetaCoV/Wuhan/WIV06/2019         | 30/12/2019             | Wild type                    |
| EPI_ISL_402130          | BetaCoV/Wuhan/WIV07/2019         | 30/12/2019             | Wild type                    |
| EPI_ISL_402132          | BetaCoV/Wuhan/HBCDC-HB-01/2019   | 30/12/2019             | Wild type                    |
| EPI_ISL_403928          | BetaCoV/Wuhan/IPBCAMS-WH-05/2020 | 01/01/2020             | Wild type                    |
| EPI_ISL_403929          | BetaCoV/Wuhan/IPBCAMS-WH-04/2019 | 30/12/2019             | Wild type                    |
| EPI_ISL_403930          | BetaCoV/Wuhan/IPBCAMS-WH-03/2019 | 30/12/2019             | Wild type                    |
| EPI_ISL_403931          | BetaCoV/Wuhan/IPBCAMS-WH-02/2019 | 30/12/2019             | Wild type                    |
| EPI_ISL_403932          | BetaCoV/Guangdong/20SF012/2020   | 14/01/2020             | Wild type                    |
| EPI_ISL_403933          | BetaCoV/Guangdong/20SF013/2020   | 15/01/2020             | Wild type                    |
| EPI_ISL_403934          | BetaCoV/Guangdong/20SF014/2020   | 15/01/2020             | Wild type                    |
| EPI_ISL_403935          | BetaCoV/Guangdong/20SF025/2020   | 15/01/2020             | Wild type                    |
| EPI_ISL_403936          | BetaCoV/Guangdong/20SF028/2020   | 17/01/2020             | Wild type                    |
| EPI_ISL_403937          | BetaCoV/Guangdong/20SF040/2020   | 18/01/2020             | Wild type                    |
| EPI_ISL_403962          | BetaCoV/Nonthaburi/61/2020       | 08/01/2020             | Wild type                    |
| EPI_ISL_403963          | BetaCoV/Nonthaburi/74/2020       | 13/01/2020             | Wild type                    |
| EPI_ISL_404227          | BetaCoV/Zhejiang/WZ-01/2020      | 16/01/2020             | Wild type                    |
| EPI_ISL_404228          | BetaCoV/Zhejiang/WZ-02/2020      | 17/01/2020             | Wild type                    |
| EPI_ISL_404253          | BetaCoV/USA/IL1/2020             | 21/01/2020             | Wild type                    |
| EPI_ISL_404895          | BetaCoV/USA/WA1/2020             | 19/01/2020             | Wild type                    |
| EPI_ISL_405839          | BetaCoV/Shenzhen/HKU-SZ-005/2020 | 11/01/2020             | Wild type                    |
| EPI_ISL_406030          | BetaCoV/Shenzhen/HKU-SZ-002/2020 | 10/01/2020             | Wild type                    |
| EPI_ISL_406031          | BetaCoV/Taiwan/2/2020            | 23/01/2020             | Wild type                    |
| EPI_ISL_406034          | BetaCoV/USA/CA1/2020             | 27/01/2020             | Wild type                    |
| EPI_ISL_406036          | BetaCoV/USA/CA2/2020             | 20/01/2020             | Wild type                    |
| EPI_ISL_406223          | BetaCoV/USA/AZ1/2020             | 22/01/2020             | Wild type                    |
| EPI_ISL_406531          | BetaCoV/Guangdong/20SF174/2020   | 22/01/2020             | Wild type                    |
| EPI_ISL_406533          | BetaCoV/Guangzhou/20SF206/2020   | 22/01/2020             | Wild type                    |
| EPI_ISL_406534          | BetaCoV/Foshan/20SF207/2020      | 22/01/2020             | Wild type                    |
| EPI_ISL_406535          | BetaCoV/Foshan/20SF210/2020      | 22/01/2020             | Wild type                    |
| EPI_ISL_406536          | BetaCoV/Foshan/20SF211/2020      | 22/01/2020             | Wild type                    |
| EPI_ISL_406538          | BetaCoV/Guangdong/20SF201/2020   | 23/01/2020             | Wild type                    |
| EPI_ISL_406594          | BetaCoV/Shenzhen/SZTH-003/2020   | 16/01/2020             | Wild type                    |
| EPI_ISL_406597          | BetaCoV/France/IDF0373/2020      | 23/01/2020             | Wild type                    |
| EPI_ISL_406716          | BetaCoV/China/WHU01/2020         | 02/01/2020             | Wild type                    |
| EPI_ISL_406717          | BetaCoV/China/WHU02/2020         | 02/01/2020             | Wild type                    |
| EPI_ISL_406798          | BetaCov/Wuhan/WH01/2019          | 26/12/2019             | Wild type                    |
| EPI_ISL_406800          | BetaCov/Wuhan/WH03/2020          | 01/01/2020             | Wild type                    |
| EPI_ISL_406801          | BetaCov/Wuhan/WH04/2020          | 05/01/2020             | Wild type                    |
| EPI_ISL_406844          | BetaCoV/Australia/VIC01/2020     | 25/01/2020             | Wild type                    |
| EPI_ISL_406862          | BetaCoV/Germany/BavPat1/2020     | 28/01/2020             | Wild type                    |
| EPI_ISL_406970          | BetaCoV/Hangzhou/HZ-1/2020       | 20/01/2020             | Wild type                    |
| EPI_ISL_406973          | BetaCoV/Singapore/1/2020         | 23/01/2020             | Wild type                    |
| EPI_ISL_407071          | BetaCoV/England/01/2020          | 29/01/2020             | Wild type                    |

|                |                                      |            |           |
|----------------|--------------------------------------|------------|-----------|
| EPI_ISL_407073 | BetaCoV/England/02/2020              | 29/01/2020 | Wild type |
| EPI_ISL_407079 | BetaCoV/Finland/1/2020               | 29/01/2020 | Wild type |
| EPI_ISL_407084 | BetaCoV/Japan/AI/I-004/2020          | 25/01/2020 | Wild type |
| EPI_ISL_407193 | BetaCoV/Korea/KCDC03/2020            | 25/01/2020 | Wild type |
| EPI_ISL_407214 | BetaCoV/USA/WA1-A12/2020             | 25/01/2020 | Wild type |
| EPI_ISL_407215 | BetaCoV/USA/WA1-F6/2020              | 25/01/2020 | Wild type |
| EPI_ISL_407313 | BetaCoV/Hangzhou/HZCDC0001/2020      | 19/01/2020 | Wild type |
| EPI_ISL_407893 | BetaCoV/Australia/NSW01/2020         | 24/01/2020 | Wild type |
| EPI_ISL_407894 | BetaCoV/Australia/QLD01/2020         | 28/01/2020 | Wild type |
| EPI_ISL_407896 | BetaCoV/Australia/QLD02/2020         | 30/01/2020 | Wild type |
| EPI_ISL_407976 | BetaCoV/Belgium/GHB-03021/2020       | 03/02/2020 | Wild type |
| EPI_ISL_408008 | BetaCoV/USA/CA3/2020                 | 29/01/2020 | Wild type |
| EPI_ISL_408009 | BetaCoV/USA/CA4/2020                 | 29/01/2020 | Wild type |
| EPI_ISL_408010 | BetaCoV/USA/CA5/2020                 | 29/01/2020 | Wild type |
| EPI_ISL_408430 | BetaCoV/France/IDF0515/2020          | 29/01/2020 | Wild type |
| EPI_ISL_408431 | BetaCov/France/IDF0626/2020          | 29/01/2020 | Wild type |
| EPI_ISL_408478 | BetaCoV/Chongqing/YC01/2020          | 21/01/2020 | Wild type |
| EPI_ISL_408479 | BetaCoV/Chongqing/ZX01/2020          | 23/01/2020 | Wild type |
| EPI_ISL_408480 | BetaCoV/Yunnan/IVDC-YN-003/2020      | 17/01/2020 | Wild type |
| EPI_ISL_408481 | BetaCoV/Chongqing/IVDC-CQ-001/2020   | 18/01/2020 | Wild type |
| EPI_ISL_408484 | BetaCoV/Sichuan/IVDC-SC-001/2020     | 15/01/2020 | Wild type |
| EPI_ISL_408486 | BetaCoV/Jiangxi/IVDC-JX-002/2020     | 11/01/2020 | Wild type |
| EPI_ISL_408488 | BetaCoV/Jiangsu/IVDC-JS-001/2020     | 19/01/2020 | Wild type |
| EPI_ISL_408489 | BetaCoV/Taiwan/NTU01/2020            | 31/01/2020 | Wild type |
| EPI_ISL_408514 | BetaCoV/Wuhan/IVDC-HB-envF13-20/2020 | 01/01/2020 | Wild type |
| EPI_ISL_408515 | BetaCoV/Wuhan/IVDC-HB-envF13-21/2020 | 01/01/2020 | Wild type |
| EPI_ISL_408665 | BetaCoV/Japan/TY-WK-012/2020         | 29/01/2020 | Wild type |
| EPI_ISL_408666 | BetaCoV/Japan/TY-WK-501/2020         | 31/01/2020 | Wild type |
| EPI_ISL_408667 | BetaCoV/Japan/TY-WK-521/2020         | 31/01/2020 | Wild type |
| EPI_ISL_408668 | BetaCoV/Vietnam/VR03-38142/2020      | 24/01/2020 | Wild type |
| EPI_ISL_408669 | BetaCoV/Japan/KY-V-029/2020          | 29/01/2020 | Wild type |
| EPI_ISL_408670 | BetaCoV/USA/WI1/2020                 | 31/01/2020 | Wild type |
| EPI_ISL_408976 | BetaCoV/Sydney/2/2020                | 22/01/2020 | Wild type |
| EPI_ISL_408977 | BetaCoV/Sydney/3/2020                | 25/01/2020 | Wild type |
| EPI_ISL_409067 | BetaCoV/USA/MA1/2020                 | 29/01/2020 | Wild type |
| EPI_ISL_410045 | BetaCoV/USA/IL2/2020                 | 28/01/2020 | Wild type |
| EPI_ISL_410218 | BetaCov/Taiwan/NTU02/2020            | 05/02/2020 | Wild type |
| EPI_ISL_410301 | BetaCoV/Nepal/61/2020                | 13/01/2020 | Wild type |
| EPI_ISL_410531 | BetaCoV/Japan/NA-20-05-1/2020        | 25/01/2020 | Wild type |
| EPI_ISL_410532 | BetaCoV/Japan/OS-20-07-1/2020        | 23/01/2020 | Wild type |
| EPI_ISL_410545 | BetaCoV/Italy/INMI1-itl/2020         | 29/01/2020 | Wild type |
| EPI_ISL_410546 | BetaCoV/Italy/INMI1-ct/2020          | 31/01/2020 | Wild type |
| EPI_ISL_410713 | BetaCoV/Singapore/7/2020             | 27/01/2020 | Wild type |
| EPI_ISL_410714 | BetaCoV/Singapore/8/2020             | 03/02/2020 | Wild type |
| EPI_ISL_410715 | BetaCoV/Singapore/9/2020             | 04/02/2020 | Wild type |
| EPI_ISL_410716 | BetaCoV/Singapore/10/2020            | 04/02/2020 | Wild type |
| EPI_ISL_410717 | BetaCoV/Australia/QLD03/2020         | 05/02/2020 | Wild type |
| EPI_ISL_410718 | BetaCoV/Australia/QLD04/2020         | 05/02/2020 | Wild type |
| EPI_ISL_410719 | BetaCoV/Singapore/11/2020            | 02/02/2020 | Wild type |
| EPI_ISL_410720 | BetaCoV/France/IDF0372/2020          | 23/01/2020 | Wild type |
| EPI_ISL_411060 | BetaCoV/Fujian/8/2020                | 21/01/2020 | Wild type |
| EPI_ISL_411066 | BetaCoV/Fujian/13/2020               | 22/01/2020 | Wild type |
| EPI_ISL_411218 | BetaCoV/France/IDF0571/2020          | 02/02/2020 | Wild type |
| EPI_ISL_411219 | BetaCoV/France/IDF0386-isIP1/2020    | 28/01/2020 | Wild type |
| EPI_ISL_411220 | BetaCoV/France/IDF0386-isIP3/2020    | 28/01/2020 | Wild type |
| EPI_ISL_411902 | BetaCoV/Cambodia/0012/2020           | 27/01/2020 | Wild type |
| EPI_ISL_411915 | BetaCoV/Taiwan/CGMH-CGU-01/2020      | 25/01/2020 | Wild type |
| EPI_ISL_411926 | BetaCoV/Taiwan/3/2020                | 24/01/2020 | Wild type |
| EPI_ISL_411927 | BetaCoV/Taiwan/4/2020                | 28/01/2020 | Wild type |
| EPI_ISL_411950 | BetaCoV/Jiangsu/JS01/2020            | 23/01/2020 | Wild type |
| EPI_ISL_411952 | BetaCoV/Jiangsu/JS02/2020            | 24/01/2020 | Wild type |

|                |                                   |            |           |
|----------------|-----------------------------------|------------|-----------|
| EPI_ISL_411953 | BetaCoV/Jiangsu/JS03/2020         | 24/01/2020 | Wild type |
| EPI_ISL_411954 | BetaCoV/USA/CA7/2020              | 06/02/2020 | Wild type |
| EPI_ISL_411955 | BetaCoV/USA/CA8/2020              | 10/02/2020 | Wild type |
| EPI_ISL_411956 | BetaCoV/USA/TX1/2020              | 11/02/2020 | Wild type |
| EPI_ISL_411957 | BetaCoV/China/WH-09/2020          | 08/01/2020 | Wild type |
| EPI_ISL_412026 | BetaCoV/Hefei/2/2020              | 23/02/2020 | Wild type |
| EPI_ISL_412028 | BetaCoV/Hong_Kong/VM20001061/2020 | 22/01/2020 | Wild type |
| EPI_ISL_412029 | BetaCoV/Hong_Kong/VM20001988/2020 | 30/01/2020 | Wild type |
| EPI_ISL_412030 | BetaCoV/Hong_Kong/VB20026565/2020 | 01/02/2020 | Wild type |
| EPI_ISL_412116 | BetaCoV/England/09c/2020          | 09/02/2020 | Wild type |
| EPI_ISL_412459 | BetaCoV/Jingzhou/HBCDC-HB-01/2020 | 08/01/2020 | Wild type |
| EPI_ISL_412862 | BetaCoV/USA/CA9/2020              | 23/02/2020 | Wild type |
| EPI_ISL_412869 | BetaCoV/Korea/KCDC05/2020         | 30/01/2020 | Wild type |
| EPI_ISL_412870 | BetaCoV/Korea/KCDC06/2020         | 30/01/2020 | Wild type |
| EPI_ISL_412871 | BetaCoV/Korea/KCDC07/2020         | 31/01/2020 | Wild type |
| EPI_ISL_412872 | BetaCoV/Korea/KCDC12/2020         | 01/02/2020 | Wild type |
| EPI_ISL_412873 | BetaCoV/Korea/KCDC24/2020         | 06/02/2020 | Wild type |
